# Supplementary figures and images for: Glutathione-S-transferase P promotes glycolysis in asthma in association with oxidation of pyruvate kinase M2
Source: PubMed Central journal article supplement — Redox Biol. 2021 Oct 3;47:102160. doi: 10.1016/j.redox.2021.102160 (PMC8502950; doi:10.1016/j.redox.2021.102160), 2021-10-03

**FIGURE S1**

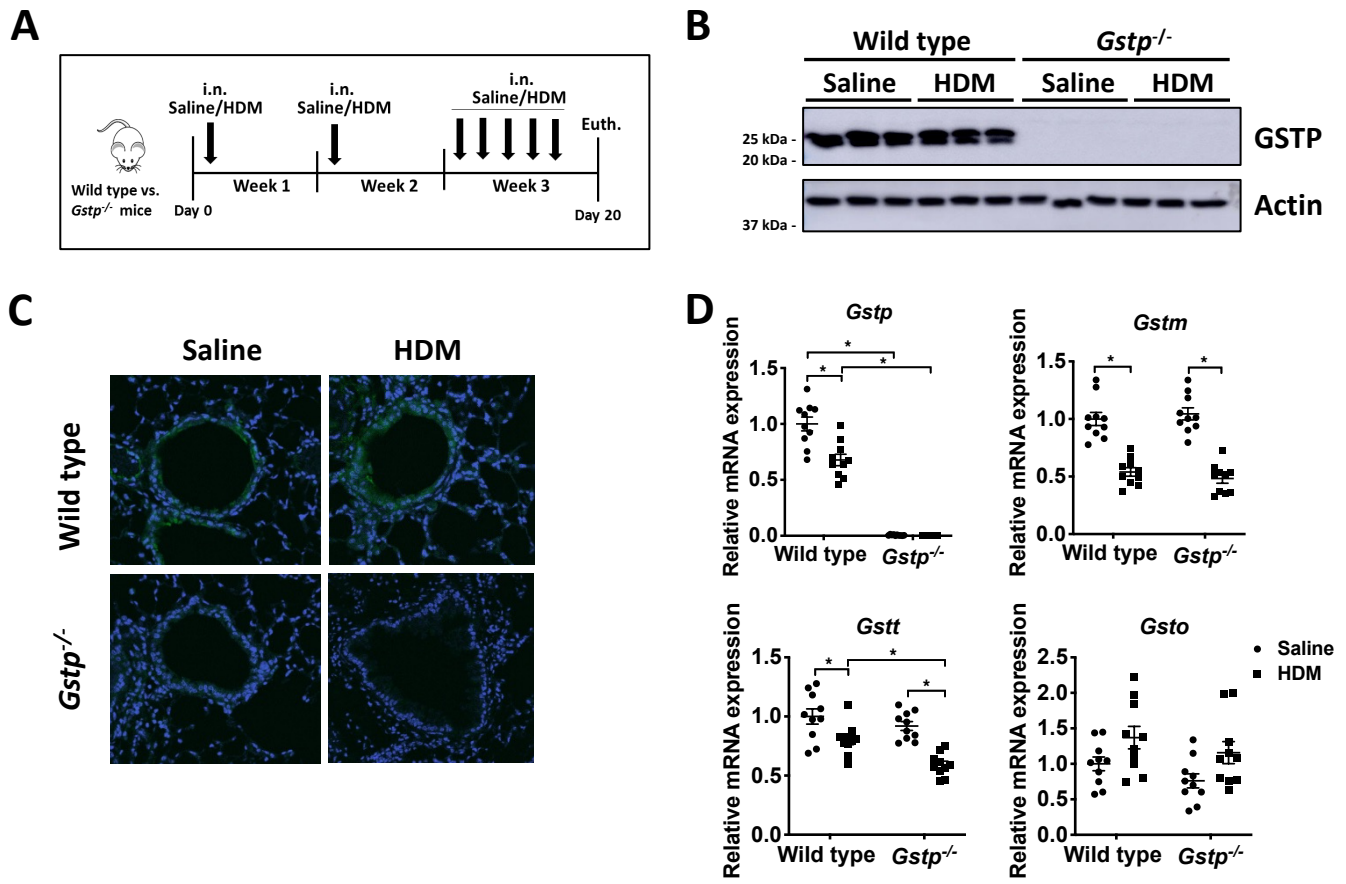

**FIGURE S2**

**A**

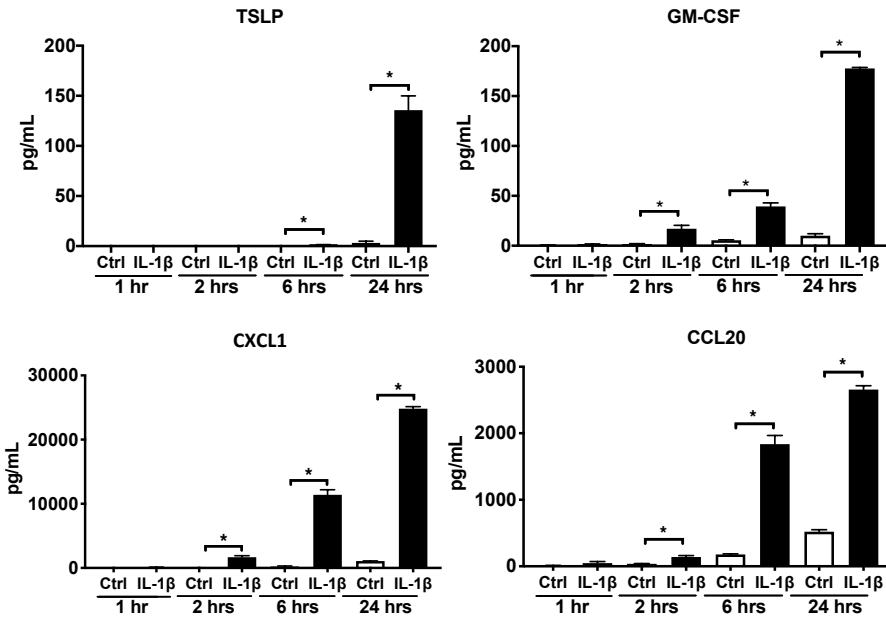

**B**

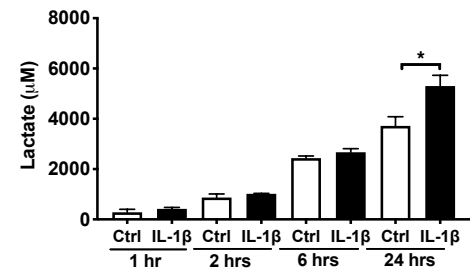

**C**

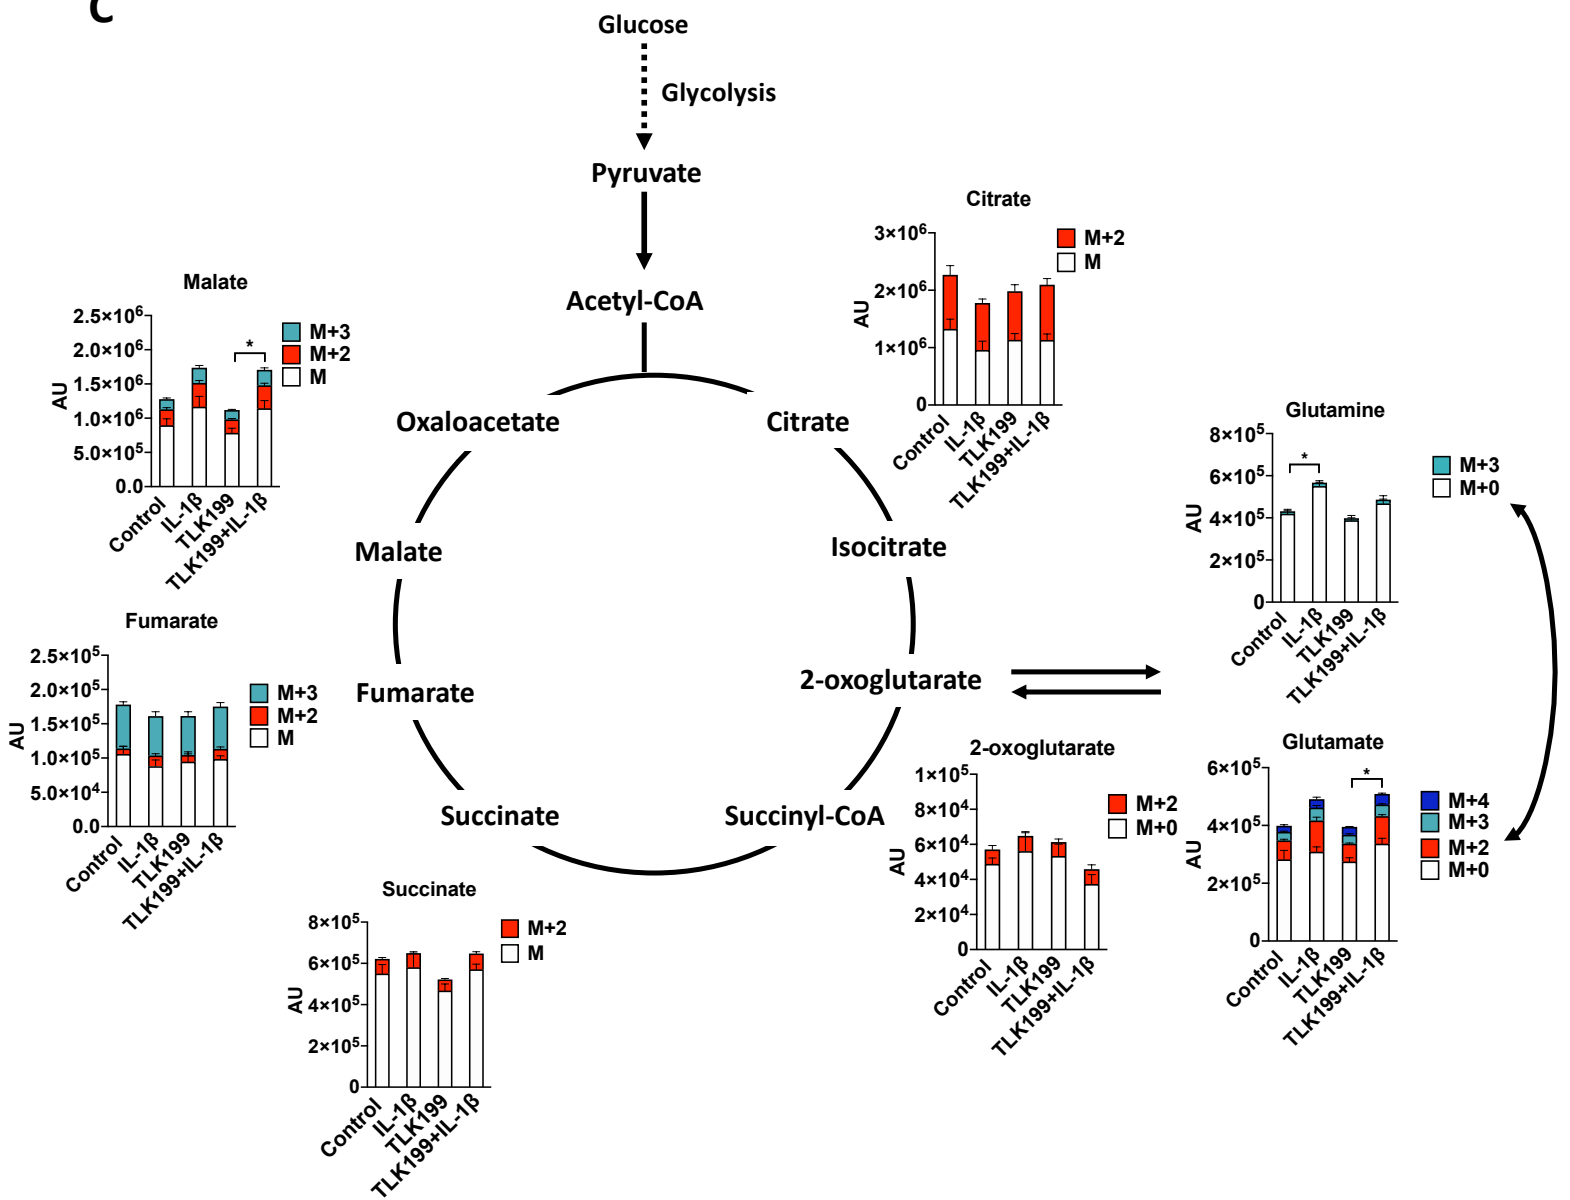

**FIGURE S3**

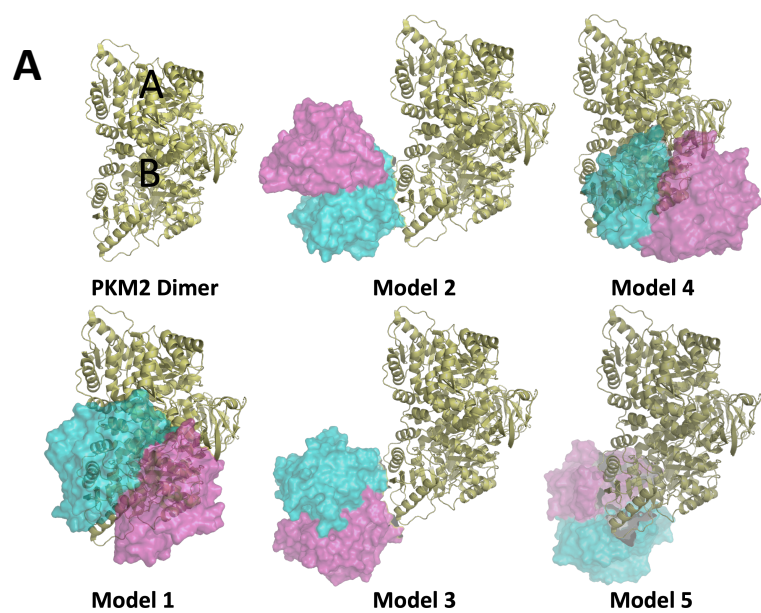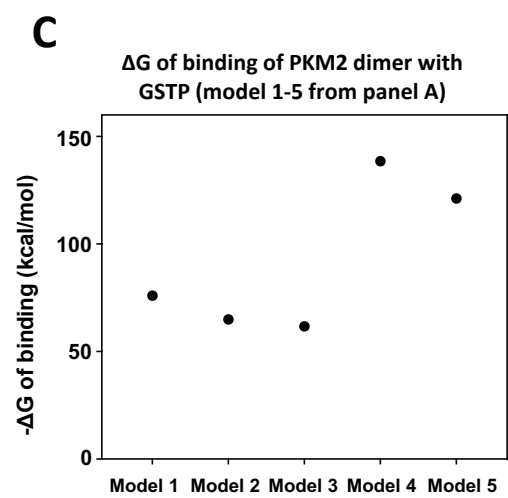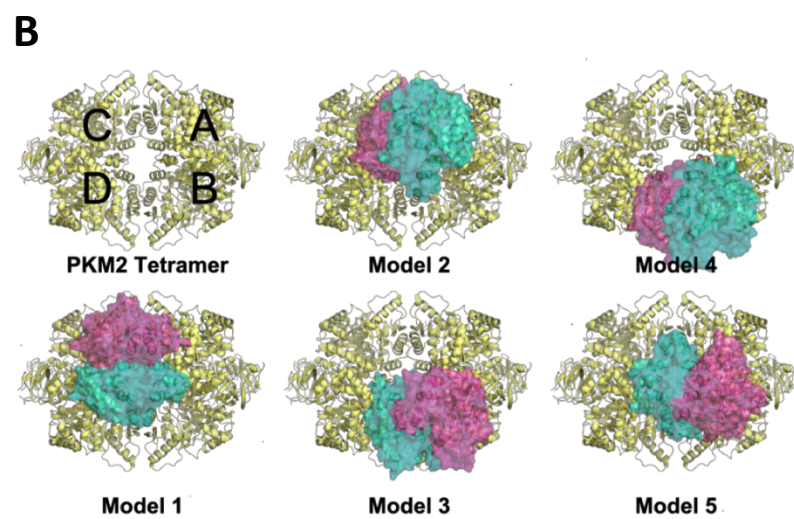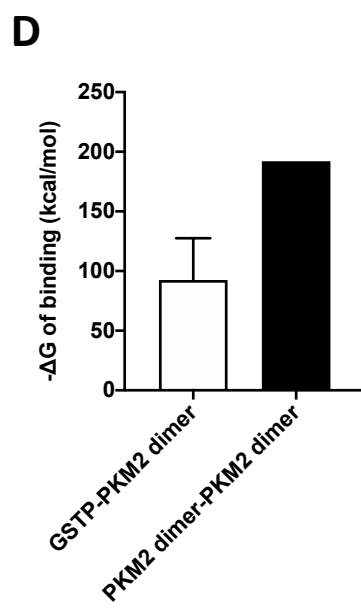

FIGURE S4

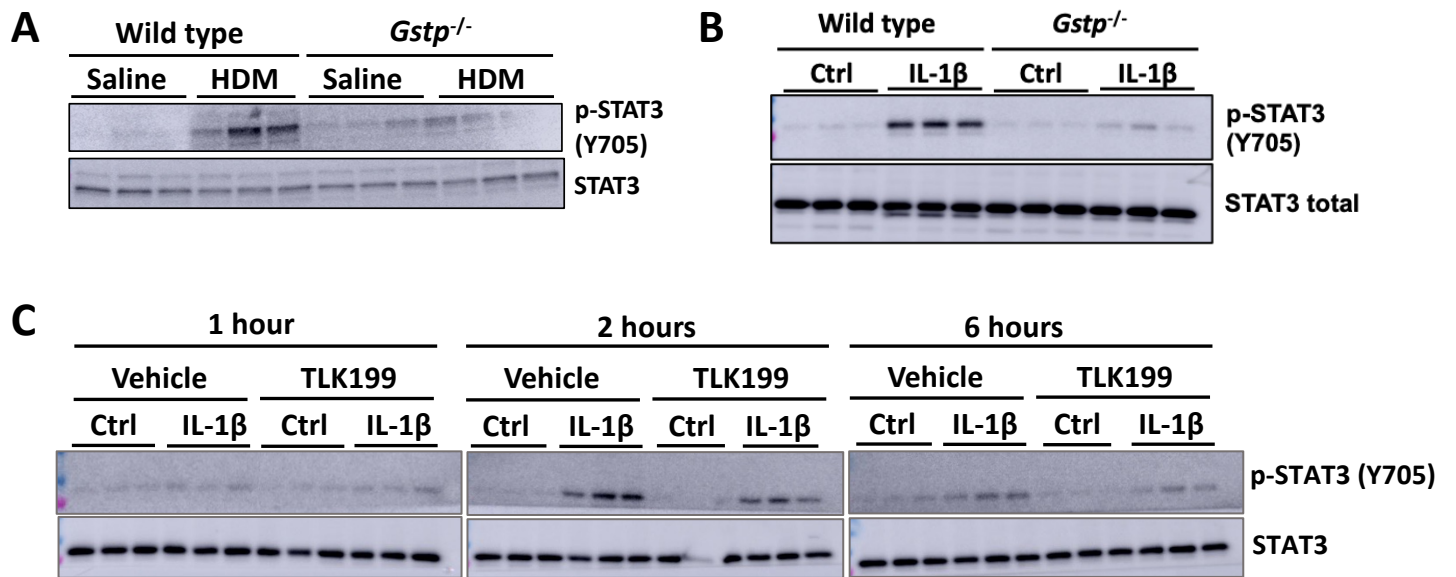

**FIGURE S5**

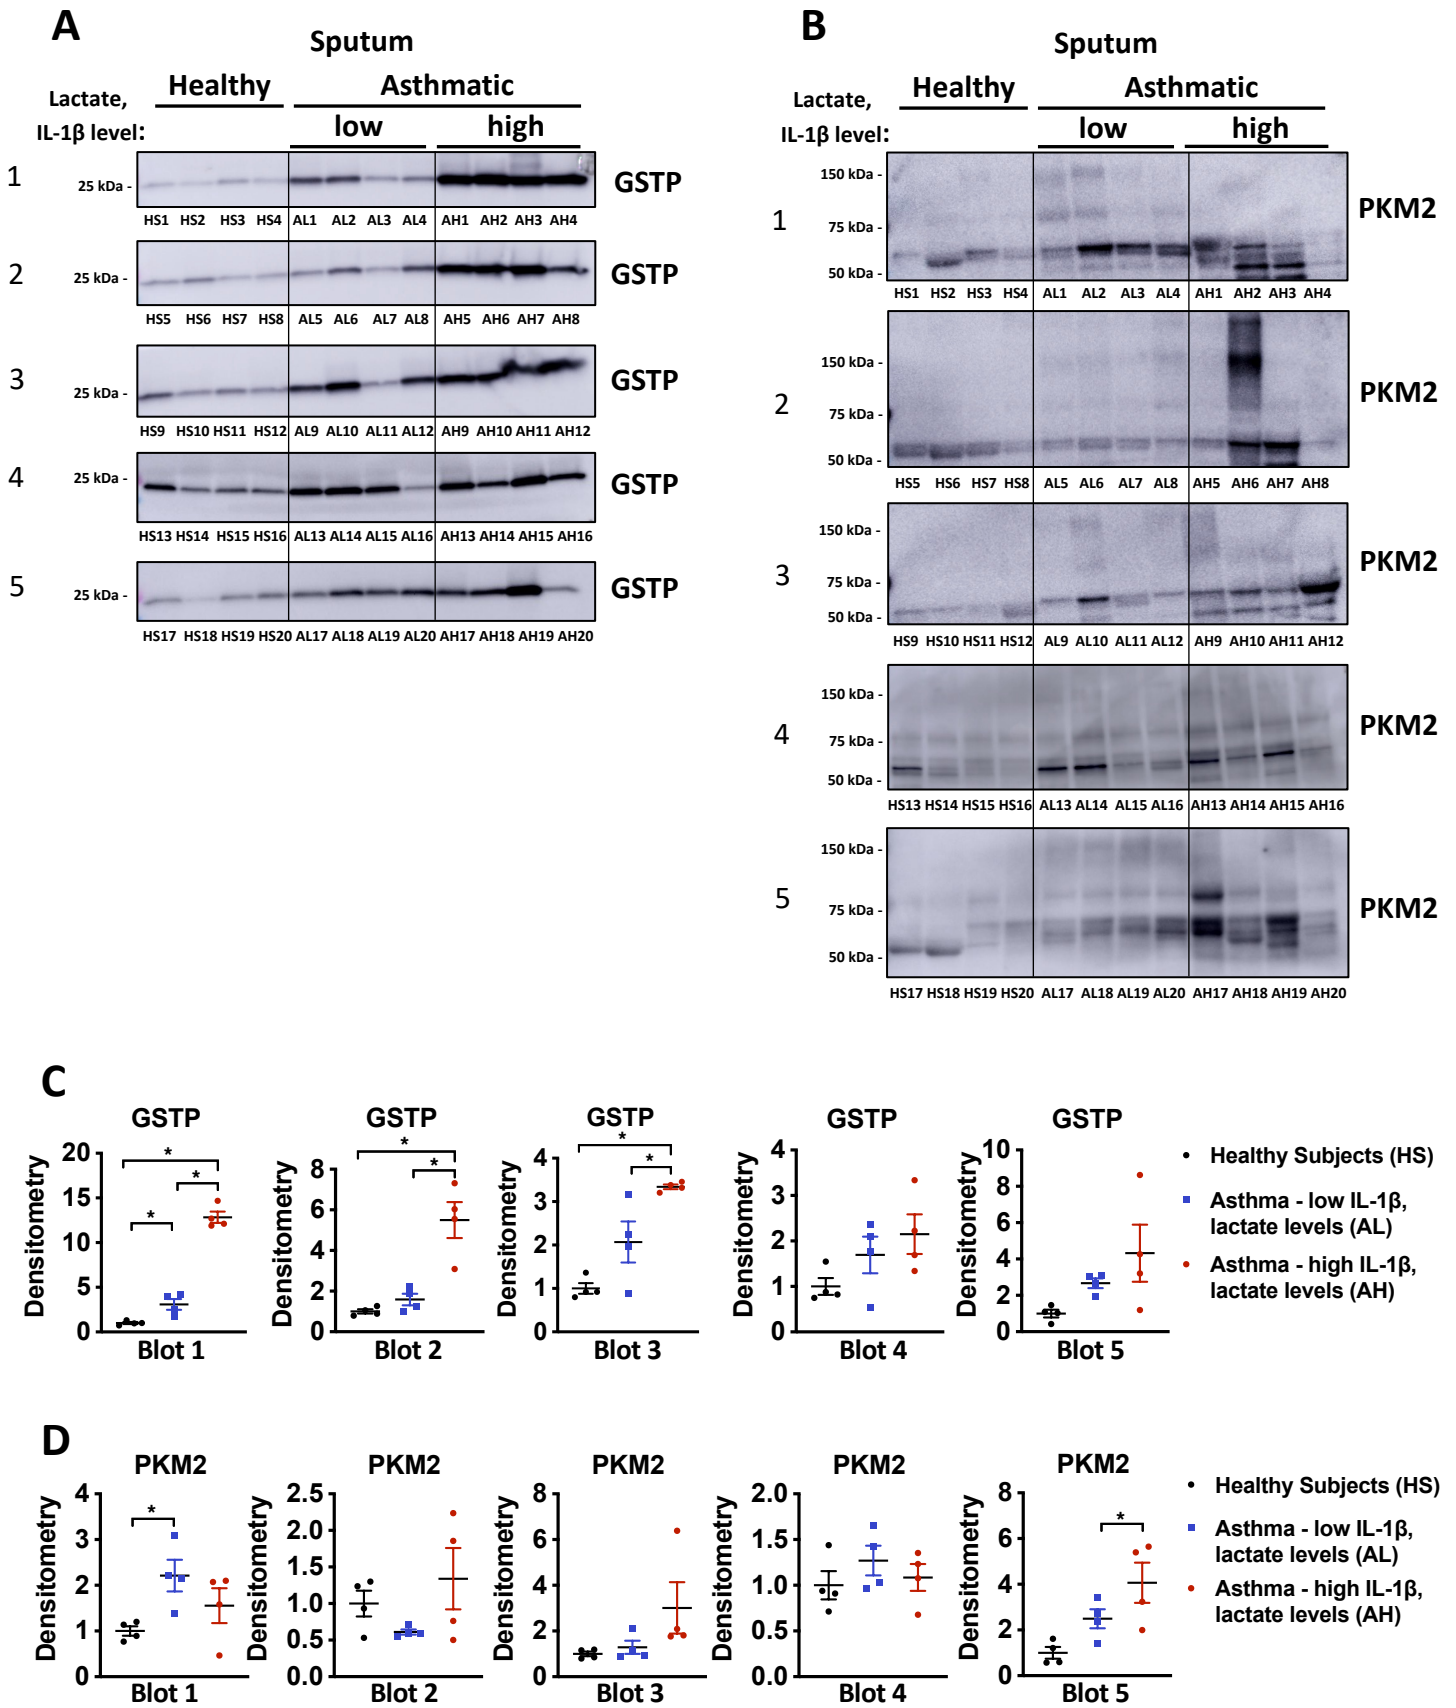

Supplement: mmc2.pdf [file mmc2.pdf]
